# Supplementary material
Source: publisher figshare collection journal article supplement (https://frontiersin.figshare.com/ndownloader/files/13269374)
Supplement: Supplementary file [file 13269374]

**Table S4 Gene action of QTLs identified by CIM in IF<sub>2</sub> population across four environments**

| Trait <sup>a</sup> | QTL <sup>b</sup>   | Env. <sup>c</sup> | Position <sup>d</sup> | A <sup>e</sup> | D <sup>e</sup> | D/A  <sup>f</sup> | GA <sup>g</sup> | Population          |
|--------------------|--------------------|-------------------|-----------------------|----------------|----------------|-------------------|-----------------|---------------------|
| FL                 | qFL-C02-1          | 2015Bg            | 43.91                 |                | -2.19          |                   | OD              | IF <sub>2</sub> MPH |
|                    | qFL-C02-2          | 2015Bg            | 75.71                 |                | 0.56           |                   | OD              | IF <sub>2</sub> MPH |
|                    | qFL-C03-1          | 2014Bg            | 94.91                 | 0.02           | -0.77          | 31.62             | OD              | IF <sub>2</sub>     |
|                    | qFL-C04-1          | 2014Bg            | 3.01                  | -0.27          | -1.03          | 3.81              | OD              | IF <sub>2</sub>     |
|                    | <b>qFL-Chr05-3</b> | 2014Bg            | 11.21                 | -1.16          |                |                   |                 | RIL                 |
|                    | qFL-C05-1          | 2014Yc            | 13.01                 | 2.68           | -3.14          | 1.17              | OD              | IF <sub>2</sub>     |
|                    | <b>qFL-Chr05-4</b> | 2014Bg            | 40.01                 | -0.32          |                |                   |                 | RIL                 |
|                    | <b>qFL-Chr05-1</b> | 2014Yc            | 45.31                 | -0.37          |                |                   |                 | RIL                 |
|                    | <b>qFL-Chr05-2</b> | 2014Yc            | 52.11                 | -0.33          |                |                   |                 | RIL                 |
|                    | qFL-C06-1          | 2015Bg            | 25.61                 |                | 0.49           |                   | OD              | IF <sub>2</sub> MPH |
|                    |                    | 2014Yc            | 27.81                 | 2.78           | -2.86          | 1.03              |                 | IF <sub>2</sub>     |
|                    | qFL-C07-1          | 2014Yc            | 49.81                 | 2.77           | -3.00          | 1.08              | OD              | IF <sub>2</sub>     |
|                    | qFL-C08-1          | 2014Yc            | 16.71                 | 2.91           | -2.70          | 0.93              | PD              | IF <sub>2</sub>     |
|                    | <b>qFL-Chr09-1</b> | 2014Bg            | 3.81                  | -0.30          |                |                   |                 | RIL                 |
|                    | qFL-C09-2          | 2015Yc            | 32.71                 | 0.36           | -0.39          | 1.08              | OD/PD           | IF <sub>2</sub>     |
|                    |                    | 2015Bg            | 32.71                 | 0.48           | -0.14          | 0.29              |                 | IF <sub>2</sub>     |
|                    | qFL-C10-1          | 2014Yc            | 36.81                 | 2.77           | -3.00          | 1.08              | OD              | IF <sub>2</sub>     |
|                    | <b>qFL-Chr10-1</b> | 2014Yc            | 44.51                 | 0.29           |                |                   |                 | RIL                 |
|                    |                    | 2014Bg            | 44.51                 | 0.26           |                |                   |                 | RIL                 |
|                    | <b>qFL-Chr12-1</b> | 2014Yc            | 16.21                 | -0.33          |                |                   |                 | RIL                 |
|                    | qFL-C13-1          | 2014Yc            | 4.91                  | 2.87           | -2.64          | 0.92              | PD              | IF <sub>2</sub>     |
|                    | qFL-C14-1          | 2014Yc            | 4.01                  | 2.85           | -2.75          | 0.97              | PD/OD           | IF <sub>2</sub>     |
|                    |                    | 2015Bg            | 6.31                  | 0.26           | 1.77           | 6.81              |                 | IF <sub>2</sub>     |
|                    | <b>qFL-Chr14-1</b> | 2014Yc            | 14.21                 | -0.50          |                |                   |                 | RIL                 |
|                    | <b>qFL-Chr14-2</b> | 2014Yc            | 20.91                 | -0.41          |                |                   |                 | RIL                 |
|                    | <b>qFL-Chr14-3</b> | 2014Yc            | 23.31                 | -0.46          |                |                   |                 | RIL                 |
|                    |                    | 2014Bg            | 25.71                 | -0.27          |                |                   |                 | RIL                 |
|                    | <b>qFL-Chr15-1</b> | 2014Yc            | 13.11                 | -0.36          |                |                   |                 | RIL                 |
|                    |                    | 2014Bg            | 12.31                 | -0.38          |                |                   |                 | RIL                 |
|                    | qFL-C16-2          | 2015Yc            | 57.01                 | -0.32          | 0.15           | 0.47              | PD/OD           | IF <sub>2</sub>     |
|                    |                    | 2015Bg            | 57.21                 | -0.10          | 0.71           | 7.05              |                 | IF <sub>2</sub>     |
|                    |                    | 2015Bg            | 57.21                 |                | 0.79           |                   |                 | IF <sub>2</sub> MPH |
|                    | qFL-C17-1          | 2014Yc            | 35.11                 | 2.74           | -2.99          | 1.09              | OD              | IF <sub>2</sub>     |
|                    | <b>qFL-Chr19-1</b> | 2014Yc            | 22.51                 | 0.46           |                |                   |                 | RIL                 |
|                    | qFL-C20-1          | 2015Yc            | 4.81                  | -0.34          | -0.38          | 1.10              | OD              | IF <sub>2</sub>     |
|                    | qFL-C20-2          | 2014Bg            | 8.01                  |                | -0.61          |                   | PD              | IF <sub>2</sub> MPH |
|                    |                    | 2015Bg            | 8.01                  | -0.81          | -0.28          | 0.35              |                 | IF <sub>2</sub>     |
|                    |                    | 2015Yc            | 9.91                  | -0.45          | -0.39          | 0.87              |                 | IF <sub>2</sub>     |
|                    | qFL-C20-3          | 2015Bg            | 13.11                 | -0.51          | -0.13          | 0.25              | PD              | IF <sub>2</sub>     |
|                    | qFL-C22-3          | 2014Bg            | 20.11                 |                | 0.37           |                   | OD              | IF <sub>2</sub> MPH |
|                    | qFL-C22-4          | 2014Bg            | 30.21                 |                | 0.39           |                   | OD              | IF <sub>2</sub> MPH |
|                    | qFL-C24-2          | 2015Yc            | 29.41                 | -0.29          | -0.22          | 0.74              | PD              | IF <sub>2</sub>     |

|     |                     |        |       |       |       |      |    |                     |
|-----|---------------------|--------|-------|-------|-------|------|----|---------------------|
| FU  | <b>qFU-Chr01-1</b>  | 2014Bg | 14.51 | -0.61 |       |      |    | RIL                 |
|     | qFU-C01-1           | 2014Yc | 35.71 | 1.43  | -1.45 | 1.02 | OD | IF <sub>2</sub>     |
|     | qFU-C03-1           | 2015Bg | 50.51 | -0.76 | 0.64  | 0.84 | PD | IF <sub>2</sub>     |
|     |                     | 2015Bg | 52.51 |       | 0.48  |      |    | IF <sub>2</sub> MPH |
|     | qFU-C03-2           | 2014Bg | 69.11 |       | -0.66 |      | OD | IF <sub>2</sub> MPH |
|     | qFU-C05-1           | 2015Bg | 40.01 | 1.06  | 1.77  | 1.67 | OD | IF <sub>2</sub>     |
|     | <b>qFU-Chr05-1</b>  | 2014Bg | 45.31 | -0.22 |       |      |    | RIL                 |
|     | qFU-C05-2           | 2015Bg | 46.91 | -0.33 | 0.65  | 1.95 | OD | IF <sub>2</sub>     |
|     |                     | 2015Bg | 46.91 |       | 0.64  |      |    | IF <sub>2</sub> MPH |
|     | qFU-C06-1           | 2015Bg | 26.61 | 1.16  | 1.76  | 1.52 | OD | IF <sub>2</sub>     |
|     | qFU-C06-2           | 2015Yc | 36.01 | -0.40 | 1.06  | 2.65 | OD | IF <sub>2</sub>     |
|     |                     | 2015Yc | 36.01 |       | 1.12  |      |    | IF <sub>2</sub> MPH |
|     | <b>qFU-Chr09-1</b>  | 2014Yc | 3.81  | -0.24 |       |      |    | RIL                 |
|     |                     | 2014Bg | 3.81  | -0.29 |       |      |    | RIL                 |
|     | <b>qFU-Chr09-5</b>  | 2014Bg | 18.11 | -0.24 |       |      |    | RIL                 |
|     | qFU-C09-3           | 2015Bg | 30.31 | -3.23 | 3.18  | 0.98 | PD | IF <sub>2</sub>     |
|     | <b>qFU-Chr09-2</b>  | 2014Yc | 47.11 | -0.24 |       |      |    | RIL                 |
|     |                     | 2014Bg | 47.11 | -0.24 |       |      |    | RIL                 |
|     | <b>qFU-Chr09-3</b>  | 2014Yc | 52.61 | 0.30  |       |      |    | RIL                 |
|     |                     | 2014Bg | 52.61 | 0.29  |       |      |    | RIL                 |
|     | qFU-C09-4           | 2014Bg | 54.71 | 0.30  | 0.08  | 0.26 | PD | IF <sub>2</sub>     |
|     | <b>qFU-Chr09-4</b>  | 2014Yc | 61.41 | -0.20 |       |      |    | RIL                 |
|     | qFU-C11-1           | 2015Bg | 5.31  | -1.99 | 3.20  | 1.61 | OD | IF <sub>2</sub>     |
|     |                     | 2015Bg | 5.31  |       | 3.44  |      |    | IF <sub>2</sub> MPH |
|     | qFU-C13-1           | 2014Bg | 30.21 | -0.38 | 0.07  | 0.18 | PD | IF <sub>2</sub>     |
|     | qFU-C14-1           | 2015Bg | 1.11  | -3.22 | 3.31  | 1.03 | OD | IF <sub>2</sub>     |
|     |                     | 2015Bg | 1.11  |       | 4.14  |      |    | IF <sub>2</sub> MPH |
|     | <b>qFU-Chr19-1</b>  | 2014Yc | 20.81 | -0.22 |       |      |    | RIL                 |
|     | qFU-C20-1           | 2014Yc | 31.11 | 0.41  | -1.11 | 2.69 | OD | IF <sub>2</sub>     |
|     | qFU-C20-2           | 2014Yc | 41.51 | -0.34 | -0.38 | 1.11 | OD | IF <sub>2</sub>     |
|     | qFU-C21-1           | 2015Yc | 44.61 |       | 0.01  |      | OD | IF <sub>2</sub> MPH |
|     | qFU-C21-2           | 2015Yc | 58.91 |       | -0.10 |      | OD | IF <sub>2</sub> MPH |
|     | qFU-C22-2           | 2015Yc | 29.31 | -0.19 | 0.50  | 2.66 | OD | IF <sub>2</sub>     |
|     | qFU-C24-1           | 2014Bg | 19.91 | 0.32  | -0.33 | 1.02 | OD | IF <sub>2</sub>     |
|     | qFU-C25-1           | 2015Yc | 41.91 | -0.45 | 1.04  | 2.31 | OD | IF <sub>2</sub>     |
|     | qFU-C25-2           | 2014Bg | 51.81 | -0.34 | 0.16  | 0.48 | PD | IF <sub>2</sub>     |
| MIC | qMIC-C01-1          | 2015Bg | 7.51  | 0.05  | -0.21 | 3.99 | OD | IF <sub>2</sub>     |
|     | <b>qMIC-Chr01-1</b> | 2014Yc | 14.51 | 0.24  |       |      |    | RIL                 |
|     | qMIC-C01-2          | 2014Yc | 15.51 | 0.13  | -0.24 | 1.80 | OD | IF <sub>2</sub>     |
|     | qMIC-C01-3          | 2015Yc | 24.91 |       | 0.57  |      | OD | IF <sub>2</sub> MPH |
|     | qMIC-C01-4          | 2015Yc | 45.71 | -0.30 | -0.26 | 0.87 | PD | IF <sub>2</sub>     |
|     |                     | 2015Yc | 45.71 |       | -0.32 |      |    | IF <sub>2</sub> MPH |
|     | <b>qMIC-Chr05-1</b> | 2014Yc | 12.61 | -0.25 |       |      |    | RIL                 |
|     | <b>qMIC-Chr07-1</b> | 2014Bg | 59.31 | 0.10  |       |      |    | RIL                 |

|    |                     |        |       |       |       |      |    |                     |
|----|---------------------|--------|-------|-------|-------|------|----|---------------------|
| FE | qMIC-C08-1          | 2015Yc | 35.61 |       | -0.70 |      | OD | IF <sub>2</sub> MPH |
|    |                     | 2014Yc | 38.01 |       | -0.58 |      |    | IF <sub>2</sub> MPH |
|    | <b>qMIC-Chr10-1</b> | 2014Yc | 62.61 | 0.16  |       |      |    | RIL                 |
|    | qMIC-C13-2          | 2015Bg | 33.81 | -0.12 | 0.10  | 0.90 | PD | IF <sub>2</sub>     |
|    | qMIC-C13-3          | 2015Bg | 40.91 | -0.12 | 0.12  | 1.00 | PD | IF <sub>2</sub>     |
|    |                     | 2014Bg | 20.91 | 0.11  |       |      |    | RIL                 |
|    | <b>qMIC-Chr14-1</b> | 2014Yc | 23.31 | 0.08  |       |      |    | RIL                 |
|    | qMIC-C14-2          | 2014Yc | 31.21 | 0.07  | -0.22 | 3.07 | OD | IF <sub>2</sub>     |
|    | qMIC-C15-2          | 2015Yc | 32.81 |       | 0.53  |      | OD | IF <sub>2</sub> MPH |
|    | qMIC-C16-1          | 2015Bg | 8.71  | 0.14  | -0.16 | 1.13 | OD | IF <sub>2</sub>     |
|    |                     | 2014Bg | 49.31 | 0.09  |       |      |    | RIL                 |
|    | <b>qMIC-Chr16-1</b> | 2014Yc | 51.01 | 0.08  |       |      |    | RIL                 |
|    | <b>qMIC-Chr16-2</b> | 2014Yc | 57.01 | 0.09  |       |      |    | RIL                 |
|    |                     | 2014Bg | 57.41 | 0.15  |       |      |    | RIL                 |
|    | <b>qMIC-Chr17-1</b> | 2014Bg | 44.81 | 0.12  |       |      |    | RIL                 |
|    | qMIC-C18-1          | 2014Yc | 5.31  | -0.04 | 0.20  | 4.43 | OD | IF <sub>2</sub>     |
|    | <b>qMIC-Chr24-1</b> | 2014Bg | 16.81 | -0.11 |       |      |    | RIL                 |
|    | qMIC-C24-2          | 2014Bg | 31.01 |       | 0.11  |      | OD | IF <sub>2</sub> MPH |
|    | qMIC-C24-3          | 2015Yc | 53.01 | 0.11  | -0.15 | 1.34 | OD | IF <sub>2</sub>     |
|    | <b>qMIC-Chr24-2</b> | 2014Bg | 73.31 | 0.44  |       |      |    | RIL                 |
|    | qFE-C01-2           | 2014Yc | 17.41 |       | -0.70 |      | OD | IF <sub>2</sub> MPH |
|    | qFE-C02-1           | 2015Yc | 23.11 |       | 0.07  |      | OD | IF <sub>2</sub> MPH |
|    |                     | 2014Yc | 27.31 |       | 1.23  |      |    | IF <sub>2</sub> MPH |
|    | <b>qFE-Chr11-1</b>  | 2014Bg | 5.31  | 1.16  |       |      |    | RIL                 |
|    | qFE-C13-2           | 2015Bg | 38.91 | -0.03 | -0.02 | 0.60 | PD | IF <sub>2</sub>     |
|    | <b>qFE-Chr14-2</b>  | 2014Bg | 1.11  | 1.09  |       |      |    | RIL                 |
|    | <b>qFE-Chr14-3</b>  | 2014Bg | 6.31  | 0.25  |       |      |    | RIL                 |
|    |                     | 2014Bg | 15.71 | 0.26  |       |      |    | RIL                 |
|    | <b>qFE-Chr14-1</b>  | 2014Yc | 16.81 | 0.30  |       |      |    | RIL                 |
|    | qFE-C14-5           | 2014Yc | 44.41 |       | -0.59 |      | OD | IF <sub>2</sub> MPH |
|    | <b>qFE-Chr16-1</b>  | 2014Bg | 1.11  | 1.17  |       |      |    | RIL                 |
|    | <b>qFE-Chr17-1</b>  | 2014Bg | 42.31 | 0.18  |       |      |    | RIL                 |
|    | <b>qFE-Chr18-1</b>  | 2014Bg | 57.51 | 0.76  |       |      |    | RIL                 |
|    | <b>qFE-Chr20-1</b>  | 2014Yc | 41.51 | 0.20  |       |      |    | RIL                 |
|    |                     | 2014Bg | 47.11 | 0.44  |       |      |    | RIL                 |
|    | qFE-C22-1           | 2014Bg | 11.61 | 1.47  | 0.12  | 0.08 | PD | IF <sub>2</sub>     |
|    | <b>qFE-Chr24-1</b>  | 2014Yc | 73.31 | 0.75  |       |      |    | RIL                 |
|    |                     | 2014Bg | 73.31 | 0.62  |       |      |    | RIL                 |
| FS | qFS-C01-1           | 2014Yc | 21.41 | -0.38 | 1.15  | 3.05 | OD | IF <sub>2</sub>     |
|    | <b>qFS-Chr05-1</b>  | 2014Bg | 54.81 | 0.52  |       |      |    | RIL                 |
|    | qFS-C06-1           | 2015Bg | 35.01 | -1.38 | 2.20  | 1.59 | OD | IF <sub>2</sub>     |
|    | qFS-C09-2           | 2015Yc | 49.81 | 1.17  | -1.03 | 0.88 | PD | IF <sub>2</sub>     |
|    | <b>qFS-Chr14-1</b>  | 2014Yc | 6.71  | -0.21 |       |      |    | RIL                 |
|    | <b>qFS-Chr14-2</b>  | 2014Yc | 14.21 | -0.28 |       |      |    | RIL                 |

|                    |        |       |       |       |      |       |                     |
|--------------------|--------|-------|-------|-------|------|-------|---------------------|
| <b>qFS-Chr14-3</b> | 2014Yc | 21.61 | -0.26 |       |      |       | RIL                 |
| <b>qFS-Chr14-4</b> | 2014Yc | 40.11 | -0.20 |       |      |       | RIL                 |
| <b>qFS-Chr19-1</b> | 2014Bg | 22.51 | 0.51  |       |      |       | RIL                 |
| <b>qFS-Chr19-2</b> | 2014Bg | 27.81 | 0.61  |       |      |       | RIL                 |
| qFS-C19-1          | 2014Bg | 45.31 | -0.43 | 0.88  | 2.03 | OD    | IF <sub>2</sub>     |
| <b>qFS-Chr20-1</b> | 2014Yc | 42.11 | -0.50 |       |      |       | RIL                 |
| <b>qFS-Chr20-2</b> | 2014Yc | 59.61 | -0.48 |       |      |       | RIL                 |
| qFS-C22-1          | 2014Bg | 31.21 | -1.45 | -2.40 | 1.66 | OD    | IF <sub>2</sub>     |
| qFS-C22-2          | 2014Bg | 39.01 | 0.30  | 2.07  | 7.00 | OD    | IF <sub>2</sub>     |
| qFS-C25-1          | 2014Bg | 2.81  |       | 0.28  |      | OD    | IF <sub>2</sub> MPH |
| qFS-C25-2          | 2014Bg | 37.01 | 0.98  | 1.99  | 2.03 | OD/PD | IF <sub>2</sub>     |
|                    | 2014Yc | 39.81 | -1.50 | -0.71 | 0.47 |       | IF <sub>2</sub>     |

<sup>a</sup> FL: fiber length; FU: fiber uniformity; MIC: micronaire; FE: fiber elongation; FS: fiber strength

<sup>b</sup> QTLs in bold are those identified by CIM in RILs in our previous study (Li et al. 2016), which was just used to estimate the gene action of IF<sub>2</sub> population

<sup>c</sup> 2014Yc: Yacheng of Hainan Province in 2014; 2014Bg: Baogang of Hainan Province in 2014; 2015Yc: Yacheng of Hainan Province in 2015; 2015Bg: Baogang of Hainan Province in 2015

<sup>d</sup> Position of QTL located on chromosome: as cM distance from the top of each chromosome

<sup>e</sup> The genetic expectation of a QTL effect obtained is the additive effect (A) from the RILs, the the additive effect (A) and dominant effect (D) when estimated from the IF<sub>2</sub>s, and the dominance effect (D) from the MPH values

<sup>f</sup> |D/A|: |dominance/additive|

<sup>g</sup> GA: gene action; PD/D partial dominance ( $|d/a| \leq 1$ ); OD overdominance ( $|d/a| > 1$ )
